# Supplementary material
Source: publisher figshare collection journal article supplement (https://gsajournals.figshare.com/articles/dataset/_/7376780)
Supplement: Supplementary file 1 [file 1]

## Sheet: Cu30
Table S3: Gene Ontology biological processes over-represented by genes differentially transcribed (FDR < 0.05) at 30 µg/L doses of copper exposure. GO ID = Gene Ontology process identification number, NDE = Number of differentially expressed genes with GO annotation, NTotal = Total number of genes with GO annotation, FDR = false discovery rate.
GO ID	Description	NDE	NTotal	FDR
GO:0006952	defense response	26	1521	0.000734089
GO:0002682	regulation of immune system process	25	1536	0.00128263
GO:0009607	response to biotic stimulus	19	978	0.00263922
GO:0051707	response to other organism	18	918	0.00263922
GO:0009605	response to external stimulus	33	2736	0.00263922
GO:0033002	muscle cell proliferation	10	266	0.00263922
GO:1902107	positive regulation of leukocyte differentiation	8	165	0.00263922
GO:0048660	regulation of smooth muscle cell proliferation	8	156	0.00263922
GO:0043207	response to external biotic stimulus	18	951	0.0029539
GO:0031323	regulation of cellular metabolic process	47	5114	0.00332026
GO:0048659	smooth muscle cell proliferation	8	169	0.00332026
GO:0043542	endothelial cell migration	9	233	0.00347451
GO:0006950	response to stress	41	4086	0.00347451
GO:0043534	blood vessel endothelial cell migration	7	125	0.00347451
GO:0010033	response to organic substance	35	3161	0.00347451
GO:0032101	regulation of response to external stimulus	18	1008	0.00379341
GO:0071310	cellular response to organic substance	30	2490	0.00379341
GO:0071774	response to fibroblast growth factor	8	186	0.00379341
GO:0043067	regulation of programmed cell death	25	1830	0.00379341
GO:0002040	sprouting angiogenesis	6	90	0.00379341
GO:0060255	regulation of macromolecule metabolic process	45	4886	0.00379341
GO:1901652	response to peptide	13	551	0.00379341
GO:0001503	ossification	13	554	0.00379341
GO:0080090	regulation of primary metabolic process	44	4723	0.00379341
GO:0009719	response to endogenous stimulus	26	1976	0.00387832
GO:0071495	cellular response to endogenous stimulus	23	1613	0.00404409
GO:1903708	positive regulation of hemopoiesis	9	267	0.00404409
GO:0033554	cellular response to stress	29	2415	0.00404409
GO:0048523	negative regulation of cellular process	42	4428	0.00404409
GO:0070555	response to interleukin-1	6	98	0.00419393
GO:0042981	regulation of apoptotic process	23	1658	0.00541586
GO:0070887	cellular response to chemical stimulus	33	3037	0.00581209
GO:0034097	response to cytokine	13	606	0.00617533
GO:0042221	response to chemical	41	4323	0.00620389
GO:0048519	negative regulation of biological process	45	5090	0.00775779
GO:0009058	biosynthetic process	46	5215	0.00775779
GO:0033993	response to lipid	16	931	0.00775779
GO:0010941	regulation of cell death	25	1975	0.00775779
GO:0006915	apoptotic process	25	1980	0.00775779
GO:1901700	response to oxygen-containing compound	24	1852	0.00775779
GO:0061061	muscle structure development	19	1245	0.00775779
GO:0001817	regulation of cytokine production	13	628	0.00775779
GO:0010604	positive regulation of macromolecule metabolic process	32	2968	0.00775779
GO:0051171	regulation of nitrogen compound metabolic process	42	4597	0.00845618
GO:0050865	regulation of cell activation	11	472	0.00845618
GO:0044249	cellular biosynthetic process	45	5078	0.00845618
GO:0048514	blood vessel morphogenesis	14	743	0.00851211
GO:0014812	muscle cell migration	7	168	0.00851211
GO:0014070	response to organic cyclic compound	16	952	0.00851211
GO:0030336	negative regulation of cell migration	8	241	0.00851211
GO:0042127	regulation of cell proliferation	22	1640	0.00869724
GO:0008283	cell proliferation	25	2026	0.00869724
GO:0002831	regulation of response to biotic stimulus	9	314	0.00874879
GO:0042035	regulation of cytokine biosynthetic process	5	76	0.00874879
GO:1902105	regulation of leukocyte differentiation	9	323	0.00874879
GO:0031497	chromatin assembly	6	120	0.00874879
GO:0009617	response to bacterium	11	477	0.00881767
GO:1903037	regulation of leukocyte cell-cell adhesion	8	252	0.00881767
GO:0019222	regulation of metabolic process	47	5543	0.00885273
GO:0048511	rhythmic process	10	395	0.00894609
GO:1901576	organic substance biosynthetic process	45	5133	0.00894609
GO:0071417	cellular response to organonitrogen compound	13	660	0.00894826
GO:0010631	epithelial cell migration	11	486	0.00894981
GO:2000145	regulation of cell motility	17	1086	0.00894981
GO:1901701	cellular response to oxygen-containing compound	18	1196	0.00908082
GO:0034723	DNA replication-dependent nucleosome organization	3	15	0.00910047
GO:0002237	response to molecule of bacterial origin	8	255	0.00930772
GO:0010243	response to organonitrogen compound	17	1082	0.00935792
GO:2000112	regulation of cellular macromolecule biosynthetic process	33	3215	0.00935792
GO:0050890	cognition	12	582	0.00935792
GO:0071345	cellular response to cytokine stimulus	11	494	0.00935792
GO:0060326	cell chemotaxis	8	249	0.00935792
GO:0090132	epithelium migration	11	495	0.00935792
GO:0001525	angiogenesis	10	411	0.00935792
GO:0010942	positive regulation of cell death	15	886	0.00955695
GO:0031960	response to corticosteroid	6	129	0.00955695
GO:0060548	negative regulation of cell death	18	1208	0.00955695
GO:0002694	regulation of leukocyte activation	10	423	0.00955695
GO:0062012	regulation of small molecule metabolic process	13	677	0.00955695
GO:0042330	taxis	16	998	0.00957441
GO:0001892	embryonic placenta development	6	136	0.00958129
GO:0050727	regulation of inflammatory response	7	192	0.00958129
GO:0051270	regulation of cellular component movement	18	1227	0.00977486
GO:1903706	regulation of hemopoiesis	11	509	0.00977486
GO:0090130	tissue migration	11	506	0.00977486
GO:0045597	positive regulation of cell differentiation	19	1347	0.00977486
GO:0046683	response to organophosphorus	6	139	0.00977486
GO:0009889	regulation of biosynthetic process	35	3559	0.00977486
GO:0008219	cell death	27	2380	0.00988098
GO:0009890	negative regulation of biosynthetic process	22	1729	0.0101204
GO:0012501	programmed cell death	26	2245	0.0101204
GO:0007611	learning or memory	11	508	0.0102274
GO:1901566	organonitrogen compound biosynthetic process	23	1832	0.0102274
GO:0009893	positive regulation of metabolic process	34	3427	0.0102781
GO:0040012	regulation of locomotion	18	1241	0.0102781
GO:0045321	leukocyte activation	13	718	0.0104504
GO:0044271	cellular nitrogen compound biosynthetic process	39	4197	0.0106796
GO:0034728	nucleosome organization	6	139	0.0106796
GO:1901699	cellular response to nitrogen compound	14	804	0.0107472
GO:0002697	regulation of immune effector process	10	432	0.0107987
GO:2000113	negative regulation of cellular macromolecule biosynthetic process	20	1508	0.0111231
GO:0007159	leukocyte cell-cell adhesion	8	283	0.0111473
GO:0002376	immune system process	29	2703	0.0111473
GO:0098609	cell-cell adhesion	13	717	0.0111473
GO:0043068	positive regulation of programmed cell death	14	823	0.0117339
GO:0001816	cytokine production	13	711	0.0117339
GO:0010556	regulation of macromolecule biosynthetic process	33	3319	0.0121304
GO:1901698	response to nitrogen compound	18	1261	0.0121885
GO:0031326	regulation of cellular biosynthetic process	34	3477	0.0123584
GO:0014074	response to purine-containing compound	6	153	0.0134662
GO:0006954	inflammatory response	9	364	0.0143463
GO:2000146	negative regulation of cell motility	9	371	0.0143463
GO:0070848	response to growth factor	15	937	0.0144357
GO:0006333	chromatin assembly or disassembly	6	151	0.0145352
GO:0040008	regulation of growth	17	1175	0.0146219
GO:0001890	placenta development	7	224	0.014932
GO:0010558	negative regulation of macromolecule biosynthetic process	20	1560	0.0151153
GO:0042493	response to drug	15	941	0.0151153
GO:0048545	response to steroid hormone	9	379	0.0157197
GO:0045785	positive regulation of cell adhesion	10	459	0.0166005
GO:0006366	transcription by RNA polymerase II	23	1958	0.0166087
GO:0010605	negative regulation of macromolecule metabolic process	28	2658	0.0168791
GO:0002763	positive regulation of myeloid leukocyte differentiation	4	59	0.0173355
GO:0051271	negative regulation of cellular component movement	9	386	0.0174136
GO:0043434	response to peptide hormone	10	467	0.0174136
GO:0009892	negative regulation of metabolic process	30	2964	0.0174136
GO:1903039	positive regulation of leukocyte cell-cell adhesion	6	169	0.0180232
GO:0010648	negative regulation of cell communication	21	1709	0.0180232
GO:0023057	negative regulation of signaling	21	1709	0.0180232
GO:0051173	positive regulation of nitrogen compound metabolic process	29	2818	0.0183506
GO:0008284	positive regulation of cell proliferation	11	567	0.0191803
GO:0035690	cellular response to drug	8	308	0.0194143
GO:0071363	cellular response to growth factor stimulus	14	869	0.019564
GO:0040013	negative regulation of locomotion	9	397	0.0199697
GO:0045892	negative regulation of transcription, DNA-templated	15	1004	0.0199697
GO:0001568	blood vessel development	14	887	0.0199697
GO:0070997	neuron death	10	486	0.0203455
GO:0006935	chemotaxis	14	892	0.0203631
GO:0007613	memory	6	165	0.0203631
GO:0045444	fat cell differentiation	6	170	0.0203884
GO:0007422	peripheral nervous system development	5	109	0.0213852
GO:0010468	regulation of gene expression	34	3604	0.021443
GO:0031055	chromatin remodeling at centromere	3	26	0.0219895
GO:0060711	labyrinthine layer development	4	66	0.0231694
GO:0015846	polyamine transport	2	6	0.0231694
GO:1902047	polyamine transmembrane transport	2	6	0.0231694
GO:1902267	regulation of polyamine transmembrane transport	2	6	0.0231694
GO:0032459	regulation of protein oligomerization	3	28	0.0239203
GO:0006355	regulation of transcription, DNA-templated	26	2446	0.0239203
GO:0032879	regulation of localization	30	3042	0.0246964
GO:0035283	central nervous system segmentation	2	6	0.0248384
GO:0051246	regulation of protein metabolic process	28	2754	0.0248384
GO:0009743	response to carbohydrate	8	331	0.0248384
GO:0050679	positive regulation of epithelial cell proliferation	6	181	0.0248384
GO:0043069	negative regulation of programmed cell death	16	1137	0.0248384
GO:0050673	epithelial cell proliferation	10	503	0.0250098
GO:0001819	positive regulation of cytokine production	8	329	0.0252547
GO:0046890	regulation of lipid biosynthetic process	6	179	0.0261129
GO:0071824	protein-DNA complex subunit organization	7	254	0.0264844
GO:1903524	positive regulation of blood circulation	5	117	0.0273456
GO:0048513	animal organ development	37	4188	0.0279607
GO:0002696	positive regulation of leukocyte activation	7	264	0.0279607
GO:0040007	growth	22	1927	0.0280916
GO:0001558	regulation of cell growth	11	613	0.0280916
GO:0022409	positive regulation of cell-cell adhesion	6	193	0.0282187
GO:0090136	epithelial cell-cell adhesion	3	29	0.0283278
GO:0031327	negative regulation of cellular biosynthetic process	20	1671	0.0284044
GO:0065004	protein-DNA complex assembly	6	185	0.0287427
GO:0036293	response to decreased oxygen levels	9	417	0.0287427
GO:0031347	regulation of defense response	13	826	0.0287427
GO:0051172	negative regulation of nitrogen compound metabolic process	25	2367	0.0287427
GO:0019216	regulation of lipid metabolic process	8	341	0.0291472
GO:0034724	DNA replication-independent nucleosome organization	3	30	0.0292212
GO:0072298	regulation of metanephric glomerulus development	2	7	0.0295395
GO:0072239	metanephric glomerulus vasculature development	2	7	0.0299911
GO:0007178	transmembrane receptor protein serine/threonine kinase signaling pathway	10	518	0.0305991
GO:0071674	mononuclear cell migration	4	69	0.0308481
GO:0045598	regulation of fat cell differentiation	5	129	0.0308481
GO:0031324	negative regulation of cellular metabolic process	26	2532	0.0311115
GO:0001775	cell activation	14	956	0.0312438
GO:0032268	regulation of cellular protein metabolic process	26	2532	0.0323544
GO:0065007	biological regulation	58	8364	0.0325549
GO:0034508	centromere complex assembly	3	32	0.0325549
GO:1901564	organonitrogen compound metabolic process	45	5615	0.0329611
GO:0042448	progesterone metabolic process	2	7	0.0329611
GO:0009725	response to hormone	16	1191	0.0335733
GO:0010467	gene expression	38	4381	0.0335733
GO:0051249	regulation of lymphocyte activation	8	365	0.0338155
GO:0070482	response to oxygen levels	9	435	0.0340933
GO:1901724	positive regulation of cell proliferation involved in kidney development	2	8	0.034606
GO:0051247	positive regulation of protein metabolic process	20	1705	0.034606
GO:0050867	positive regulation of cell activation	7	281	0.034606
GO:0048589	developmental growth	18	1447	0.034606
GO:0030334	regulation of cell migration	14	971	0.034606
GO:0006334	nucleosome assembly	3	33	0.034606
GO:0031325	positive regulation of cellular metabolic process	30	3137	0.0347364
GO:0048518	positive regulation of biological process	44	5504	0.0355448
GO:0001936	regulation of endothelial cell proliferation	5	134	0.0359661
GO:2000377	regulation of reactive oxygen species metabolic process	6	203	0.0359715
GO:0001667	ameboidal-type cell migration	11	653	0.0363802
GO:0032102	negative regulation of response to external stimulus	8	360	0.0367382
GO:0001944	vasculature development	14	982	0.0377282
GO:0044089	positive regulation of cellular component biogenesis	11	667	0.0383492
GO:0007519	skeletal muscle tissue development	6	206	0.0389006
GO:0090049	regulation of cell migration involved in sprouting angiogenesis	3	37	0.0397263
GO:0006338	chromatin remodeling	5	140	0.0397263
GO:0006591	ornithine metabolic process	2	9	0.0400404
GO:0044087	regulation of cellular component biogenesis	16	1255	0.0408294
GO:0042033	chemokine biosynthetic process	2	10	0.0420569
GO:0045073	regulation of chemokine biosynthetic process	2	10	0.0420569
GO:0050755	chemokine metabolic process	2	10	0.0420569
GO:0051384	response to glucocorticoid	4	79	0.0420569
GO:0032602	chemokine production	4	83	0.0420569
GO:0002521	leukocyte differentiation	10	584	0.0427636
GO:1903531	negative regulation of secretion by cell	7	285	0.0433462
GO:0071503	response to heparin	2	9	0.0433462
GO:0072358	cardiovascular system development	14	1003	0.0433462
GO:0006323	DNA packaging	6	211	0.0433462
GO:0065008	regulation of biological quality	36	4149	0.0433462
GO:0071554	cell wall organization or biogenesis	4	84	0.0433462
GO:0046903	secretion	18	1478	0.0433469
GO:0060674	placenta blood vessel development	3	40	0.0444821
GO:0048568	embryonic organ development	12	788	0.0450343
GO:0010565	regulation of cellular ketone metabolic process	6	212	0.0450343
GO:0046888	negative regulation of hormone secretion	5	141	0.0450343
GO:0060713	labyrinthine layer morphogenesis	3	38	0.045493
GO:0006955	immune response	15	1123	0.0456736
GO:0031099	regeneration	7	296	0.0456736
GO:0072216	positive regulation of metanephros development	2	10	0.0456736
GO:0060623	regulation of chromosome condensation	2	10	0.0456736
GO:0042546	cell wall biogenesis	3	39	0.0456736
GO:0002042	cell migration involved in sprouting angiogenesis	3	40	0.0456736
GO:0042089	cytokine biosynthetic process	5	145	0.0456736
GO:0009636	response to toxic substance	9	473	0.0464024
GO:0006357	regulation of transcription by RNA polymerase II	19	1655	0.0470644
GO:0007565	female pregnancy	5	147	0.0470644
GO:0043535	regulation of blood vessel endothelial cell migration	4	87	0.0470644
GO:0016049	cell growth	13	910	0.0480076
GO:0061476	response to anticoagulant	2	10	0.0493138
GO:0048522	positive regulation of cellular process	40	4889	0.0493138
GO:0043065	positive regulation of apoptotic process	9	486	0.0493138
GO:0002683	negative regulation of immune system process	9	484	0.0493138
GO:0002684	positive regulation of immune system process	13	910	0.0493138
GO:0022610	biological adhesion	19	1645	0.0493138
GO:0001935	endothelial cell proliferation	5	150	0.0493138
GO:0044706	multi-multicellular organism process	7	304	0.0493138
GO:0060669	embryonic placenta morphogenesis	3	41	0.0493138
GO:0042107	cytokine metabolic process	5	149	0.0493138
GO:0021594	rhombomere formation	2	10	0.0493493
GO:0032496	response to lipopolysaccharide	5	154	0.0495117
GO:0022407	regulation of cell-cell adhesion	8	401	0.0497882
GO:0051048	negative regulation of secretion	7	300	0.0497882
GO:0071407	cellular response to organic cyclic compound	10	599	0.0512274
GO:0009991	response to extracellular stimulus	10	602	0.0519529
GO:0010629	negative regulation of gene expression	20	1798	0.0519529
GO:0097327	response to antineoplastic agent	4	88	0.0524511
GO:0040011	locomotion	24	2375	0.0526343
GO:0009628	response to abiotic stimulus	21	1947	0.0529085
GO:0072124	regulation of glomerular mesangial cell proliferation	2	11	0.052994
GO:0090193	positive regulation of glomerulus development	2	11	0.0533217
GO:0050877	nervous system process	17	1416	0.0538301
GO:1903506	regulation of nucleic acid-templated transcription	27	2809	0.0538301
GO:0071396	cellular response to lipid	10	609	0.0538301
GO:2001141	regulation of RNA biosynthetic process	27	2815	0.0551463
GO:0051094	positive regulation of developmental process	20	1818	0.0551463
GO:0071168	protein localization to chromatin	2	11	0.0560417
GO:1901342	regulation of vasculature development	7	317	0.0564239
GO:0034405	response to fluid shear stress	3	44	0.0564701
GO:0042108	positive regulation of cytokine biosynthetic process	3	44	0.0564886
GO:0071219	cellular response to molecule of bacterial origin	5	162	0.0564886
GO:0007610	behavior	16	1300	0.0565901
GO:0043523	regulation of neuron apoptotic process	7	316	0.0565901
GO:0072203	cell proliferation involved in metanephros development	2	13	0.0570739
GO:0010628	positive regulation of gene expression	19	1690	0.0576039
GO:0043900	regulation of multi-organism process	11	712	0.059641
GO:0072110	glomerular mesangial cell proliferation	2	12	0.0602375
GO:0045621	positive regulation of lymphocyte differentiation	4	103	0.0603023
GO:0070828	heterochromatin organization	3	47	0.0605253
GO:0021593	rhombomere morphogenesis	2	12	0.0622769
GO:0032940	secretion by cell	16	1303	0.0629432
GO:0031399	regulation of protein modification process	20	1864	0.0633213
GO:0051262	protein tetramerization	5	155	0.0639495
GO:0050691	regulation of defense response to virus by host	5	168	0.0648287
GO:0051930	regulation of sensory perception of pain	2	12	0.0648287
GO:0070486	leukocyte aggregation	2	13	0.0648287
GO:0002274	myeloid leukocyte activation	5	167	0.0674174
GO:0042116	macrophage activation	3	46	0.067559
GO:0009888	tissue development	27	2880	0.067559
GO:0001101	response to acid chemical	9	517	0.067559
GO:0045619	regulation of lymphocyte differentiation	5	176	0.0679797
GO:0002252	immune effector process	11	736	0.068516
GO:0007155	cell adhesion	17	1453	0.0690695
GO:0048585	negative regulation of response to stimulus	20	1869	0.0690695
GO:1901722	regulation of cell proliferation involved in kidney development	2	14	0.0690695
GO:0050873	brown fat cell differentiation	2	13	0.0690695
GO:0043281	regulation of cysteine-type endopeptidase activity involved in apoptotic process	6	248	0.0690695
GO:1903426	regulation of reactive oxygen species biosynthetic process	4	103	0.0690695
GO:0051252	regulation of RNA metabolic process	28	3025	0.0690695
GO:0007623	circadian rhythm	6	250	0.0698869
GO:0006595	polyamine metabolic process	2	15	0.0698869
GO:0051046	regulation of secretion	13	964	0.0699262
GO:1901214	regulation of neuron death	8	430	0.070102
GO:0097237	cellular response to toxic substance	5	172	0.0724017
GO:0009968	negative regulation of signal transduction	17	1485	0.0736137
GO:0090154	positive regulation of sphingolipid biosynthetic process	2	14	0.0740992
GO:0034645	cellular macromolecule biosynthetic process	35	4137	0.0743422
GO:0071636	positive regulation of transforming growth factor beta production	2	15	0.0743422
GO:1903670	regulation of sprouting angiogenesis	3	52	0.0743924
GO:0043618	regulation of transcription from RNA polymerase II promoter in response to stress	4	104	0.0743924
GO:0050709	negative regulation of protein secretion	5	170	0.0743924
GO:1904018	positive regulation of vasculature development	5	172	0.0759871
GO:0022414	reproductive process	24	2479	0.0773236
GO:0019219	regulation of nucleobase-containing compound metabolic process	30	3373	0.0795067
GO:0060538	skeletal muscle organ development	7	346	0.0802274
GO:0016477	cell migration	18	1630	0.0802531
GO:0043620	regulation of DNA-templated transcription in response to stress	4	107	0.0807542
GO:0050863	regulation of T cell activation	6	267	0.0814491
GO:0051402	neuron apoptotic process	7	347	0.0817548
GO:0014910	regulation of smooth muscle cell migration	4	105	0.0819835
GO:0050794	regulation of cellular process	53	7549	0.0819835
GO:0030155	regulation of cell adhesion	12	875	0.0825262
GO:0045834	positive regulation of lipid metabolic process	5	181	0.0862917
GO:0006351	transcription, DNA-templated	27	2934	0.0865262
GO:0071216	cellular response to biotic stimulus	5	188	0.0876388
GO:2000303	regulation of ceramide biosynthetic process	2	16	0.088738
GO:0042492	gamma-delta T cell differentiation	2	18	0.0899246
GO:0048167	regulation of synaptic plasticity	6	269	0.0901845
GO:0031348	negative regulation of defense response	5	187	0.0913495
GO:0071634	regulation of transforming growth factor beta production	3	55	0.0925192
GO:0070199	establishment of protein localization to chromosome	2	17	0.0930568
GO:0097659	nucleic acid-templated transcription	27	2955	0.0936877
GO:0000003	reproduction	24	2526	0.0936877
GO:1903530	regulation of secretion by cell	12	890	0.0943268
GO:0019752	carboxylic acid metabolic process	17	1512	0.0943268
GO:0006342	chromatin silencing	4	119	0.0948403
GO:1903507	negative regulation of nucleic acid-templated transcription	15	1276	0.0950671
GO:0045927	positive regulation of growth	9	560	0.0951052
GO:0032774	RNA biosynthetic process	27	2962	0.0951052
GO:1902679	negative regulation of RNA biosynthetic process	15	1279	0.0959484
GO:0046643	regulation of gamma-delta T cell activation	2	19	0.0963649
GO:0097529	myeloid leukocyte migration	5	187	0.0972768
GO:0010035	response to inorganic substance	12	898	0.0972768
GO:0010596	negative regulation of endothelial cell migration	3	59	0.099419
GO:0080134	regulation of response to stress	18	1672	0.099419
GO:0032731	positive regulation of interleukin-1 beta production	2	18	0.099419
GO:0048583	regulation of response to stimulus	33	3940	0.0998217
GO:0050789	regulation of biological process	55	8037	0.0998217
GO:0002688	regulation of leukocyte chemotaxis	4	118	0.0998217
GO:0048870	cell motility	20	1957	0.0998217
GO:0090278	negative regulation of peptide hormone secretion	4	116	0.0998604
GO:0035295	tube development	18	1684	0.0998604
GO:0044281	small molecule metabolic process	24	2515	0.100061
GO:2000116	regulation of cysteine-type endopeptidase activity	6	278	0.100814
GO:0071676	negative regulation of mononuclear cell migration	2	17	0.100814
GO:0098542	defense response to other organism	9	574	0.100912
GO:0072593	reactive oxygen species metabolic process	6	279	0.100912
GO:0008152	metabolic process	59	8828	0.100912
GO:0030595	leukocyte chemotaxis	5	189	0.101659
GO:2000142	regulation of DNA-templated transcription, initiation	3	64	0.10188
GO:0051716	cellular response to stimulus	44	5881	0.102045
GO:0046629	gamma-delta T cell activation	2	20	0.102328
GO:0006700	C21-steroid hormone biosynthetic process	2	18	0.103397
GO:0090192	regulation of glomerulus development	2	18	0.103397
GO:0071675	regulation of mononuclear cell migration	3	59	0.104143
GO:0051674	localization of cell	20	1972	0.104143
GO:0009059	macromolecule biosynthetic process	35	4252	0.104416
GO:0014909	smooth muscle cell migration	4	118	0.104416
GO:2000026	regulation of multicellular organismal development	24	2552	0.104416
GO:0051239	regulation of multicellular organismal process	31	3628	0.104644
GO:0072111	cell proliferation involved in kidney development	2	20	0.105018
GO:0060135	maternal process involved in female pregnancy	3	63	0.105645
GO:0010632	regulation of epithelial cell migration	6	282	0.105779
GO:0050688	regulation of defense response to virus	5	200	0.108594
GO:0071604	transforming growth factor beta production	3	60	0.109065
GO:0045595	regulation of cell differentiation	22	2274	0.110198
GO:0090153	regulation of sphingolipid biosynthetic process	2	19	0.110198
GO:1905038	regulation of membrane lipid metabolic process	2	19	0.110198
GO:0039694	viral RNA genome replication	2	18	0.110198
GO:0002689	negative regulation of leukocyte chemotaxis	2	18	0.110198
GO:0051240	positive regulation of multicellular organismal process	20	1988	0.111198
GO:0051272	positive regulation of cellular component movement	10	695	0.111466
GO:0001701	in utero embryonic development	6	286	0.111466
GO:1903409	reactive oxygen species biosynthetic process	4	126	0.111466
GO:0021546	rhombomere development	2	19	0.117217
GO:0009746	response to hexose	6	293	0.118744
GO:0071347	cellular response to interleukin-1	2	22	0.118744
GO:0048731	system development	41	5393	0.118923
GO:0031333	negative regulation of protein complex assembly	4	131	0.121945
GO:0050806	positive regulation of synaptic transmission	5	211	0.12348
GO:0002792	negative regulation of peptide secretion	5	202	0.123503
GO:0034284	response to monosaccharide	6	297	0.124675
GO:0051591	response to cAMP	3	68	0.124675
GO:0000302	response to reactive oxygen species	6	298	0.126271
GO:0060575	intestinal epithelial cell differentiation	2	23	0.128501
GO:0043254	regulation of protein complex assembly	8	510	0.128501
GO:0042698	ovulation cycle	3	66	0.132573
GO:0072215	regulation of metanephros development	2	24	0.132636
GO:0051607	defense response to virus	5	215	0.13346
GO:0097485	neuron projection guidance	9	614	0.133469
GO:0034612	response to tumor necrosis factor	5	214	0.135839
GO:0071496	cellular response to external stimulus	7	404	0.136841
GO:0051385	response to mineralocorticoid	2	22	0.137115
GO:0040017	positive regulation of locomotion	10	723	0.138831
GO:0045580	regulation of T cell differentiation	4	143	0.138856
GO:0046649	lymphocyte activation	9	627	0.138856
GO:0042113	B cell activation	5	222	0.138856
GO:0042036	negative regulation of cytokine biosynthetic process	2	24	0.139536
GO:0019538	protein metabolic process	37	4725	0.139536
GO:0009064	glutamine family amino acid metabolic process	4	129	0.13981
GO:0051241	negative regulation of multicellular organismal process	16	1481	0.141294
GO:0045637	regulation of myeloid cell differentiation	6	310	0.141294
GO:0042180	cellular ketone metabolic process	6	301	0.141294
GO:0007612	learning	6	303	0.141616
GO:0031507	heterochromatin assembly	2	26	0.142065
GO:0015695	organic cation transport	3	69	0.142685
GO:0051253	negative regulation of RNA metabolic process	15	1366	0.142919
GO:0032732	positive regulation of interleukin-1 production	2	24	0.143038
GO:0050793	regulation of developmental process	28	3249	0.143038
GO:2000379	positive regulation of reactive oxygen species metabolic process	3	75	0.143038
GO:0021610	facial nerve morphogenesis	2	24	0.143978
GO:0043436	oxoacid metabolic process	17	1618	0.143978
GO:0030217	T cell differentiation	5	230	0.145537
GO:0060487	lung epithelial cell differentiation	2	26	0.146638
GO:0071236	cellular response to antibiotic	4	141	0.147301
GO:1901653	cellular response to peptide	7	408	0.148902
GO:0019438	aromatic compound biosynthetic process	31	3705	0.149644
GO:0010566	regulation of ketone biosynthetic process	2	24	0.149644
GO:0071357	cellular response to type I interferon	2	27	0.151409
GO:0031401	positive regulation of protein modification process	14	1238	0.151721
GO:0006082	organic acid metabolic process	17	1631	0.151721
GO:0045670	regulation of osteoclast differentiation	3	77	0.151721
GO:0071103	DNA conformation change	6	313	0.151721
GO:0042110	T cell activation	7	424	0.151721
GO:0032642	regulation of chemokine production	3	76	0.152461
GO:0072224	metanephric glomerulus development	2	24	0.152461
GO:0048608	reproductive structure development	12	988	0.152461
GO:0033687	osteoblast proliferation	3	75	0.153385
GO:0006352	DNA-templated transcription, initiation	5	228	0.153385
GO:0050678	regulation of epithelial cell proliferation	7	415	0.155415
GO:0052548	regulation of endopeptidase activity	6	316	0.155963
GO:0014745	negative regulation of muscle adaptation	2	25	0.156781
GO:0051251	positive regulation of lymphocyte activation	5	235	0.156781
GO:0033081	regulation of T cell differentiation in thymus	2	28	0.156781
GO:0050922	negative regulation of chemotaxis	3	73	0.156968
GO:0030335	positive regulation of cell migration	7	414	0.157706
GO:0045933	positive regulation of muscle contraction	3	75	0.159824
GO:0006665	sphingolipid metabolic process	4	146	0.160469
GO:0009612	response to mechanical stimulus	6	319	0.160469
GO:0045582	positive regulation of T cell differentiation	3	83	0.160469
GO:0043030	regulation of macrophage activation	2	24	0.160547
GO:0032760	positive regulation of tumor necrosis factor production	2	24	0.161257
GO:0050896	response to stimulus	49	6973	0.162143
GO:0042133	neurotransmitter metabolic process	5	224	0.163226
GO:0097366	response to bronchodilator	3	78	0.167311
GO:0043537	negative regulation of blood vessel endothelial cell migration	2	28	0.167554
GO:1903671	negative regulation of sprouting angiogenesis	2	28	0.167554
GO:0032787	monocarboxylic acid metabolic process	9	634	0.168962
GO:0031645	negative regulation of neurological system process	2	27	0.168962
GO:0034249	negative regulation of cellular amide metabolic process	5	236	0.170137
GO:0000726	non-recombinational repair	3	83	0.170137
GO:0046889	positive regulation of lipid biosynthetic process	3	77	0.170137
GO:0045934	negative regulation of nucleobase-containing compound metabolic process	16	1547	0.170815
GO:0045814	negative regulation of gene expression, epigenetic	4	157	0.171627
GO:0031647	regulation of protein stability	5	237	0.172857
GO:0034340	response to type I interferon	2	30	0.173134
GO:0031328	positive regulation of cellular biosynthetic process	18	1810	0.173487
GO:0034654	nucleobase-containing compound biosynthetic process	30	3600	0.173961
GO:0051051	negative regulation of transport	9	647	0.175949
GO:0046883	regulation of hormone secretion	7	428	0.176643
GO:0034248	regulation of cellular amide metabolic process	8	534	0.176643
GO:0008285	negative regulation of cell proliferation	7	430	0.176907
GO:0061458	reproductive system development	12	1021	0.177316
GO:0045765	regulation of angiogenesis	5	240	0.179374
GO:0072109	glomerular mesangium development	2	27	0.180777
GO:0009653	anatomical structure morphogenesis	31	3814	0.180777
GO:0009611	response to wounding	11	888	0.181048
GO:0009309	amine biosynthetic process	2	30	0.181476
GO:0042401	cellular biogenic amine biosynthetic process	2	30	0.181476
GO:0016525	negative regulation of angiogenesis	2	30	0.181476
GO:0008544	epidermis development	7	435	0.18169
GO:0045639	positive regulation of myeloid cell differentiation	4	160	0.181938
GO:0009314	response to radiation	10	788	0.18311
GO:0072359	circulatory system development	17	1695	0.186203
GO:0002761	regulation of myeloid leukocyte differentiation	4	159	0.186203
GO:0010830	regulation of myotube differentiation	3	83	0.19029
GO:0071559	response to transforming growth factor beta	6	335	0.19029
GO:2000147	positive regulation of cell motility	9	663	0.19029
GO:1901362	organic cyclic compound biosynthetic process	31	3797	0.191641
GO:0044057	regulation of system process	11	900	0.191641
GO:0001505	regulation of neurotransmitter levels	8	540	0.19246
GO:0051291	protein heterooligomerization	3	84	0.192562
GO:0010557	positive regulation of macromolecule biosynthetic process	17	1706	0.199175
GO:0090025	regulation of monocyte chemotaxis	2	30	0.200193
GO:0051224	negative regulation of protein transport	5	245	0.201677
GO:0036119	response to platelet-derived growth factor	2	31	0.202077
GO:0071773	cellular response to BMP stimulus	5	246	0.202138
GO:0001932	regulation of protein phosphorylation	15	1451	0.206854
GO:0050804	modulation of chemical synaptic transmission	8	564	0.207082
GO:0010633	negative regulation of epithelial cell migration	3	89	0.207847
GO:0061448	connective tissue development	7	442	0.209766
GO:0001501	skeletal system development	9	675	0.209825
GO:0016925	protein sumoylation	2	32	0.212138
GO:1901215	negative regulation of neuron death	5	253	0.212251
GO:0070734	histone H3-K27 methylation	2	32	0.212251
GO:0030098	lymphocyte differentiation	6	366	0.212501
GO:1902680	positive regulation of RNA biosynthetic process	15	1452	0.212501
GO:1903508	positive regulation of nucleic acid-templated transcription	15	1452	0.212501
GO:0006468	protein phosphorylation	17	1734	0.212501
GO:0002548	monocyte chemotaxis	2	32	0.212501
GO:0051570	regulation of histone H3-K9 methylation	2	35	0.212501
GO:0031644	regulation of neurological system process	3	89	0.213854
GO:0032233	positive regulation of actin filament bundle assembly	3	92	0.21627
GO:1990266	neutrophil migration	3	89	0.216987
GO:0035988	chondrocyte proliferation	2	32	0.217014
GO:0009891	positive regulation of biosynthetic process	18	1874	0.221714
GO:0002686	negative regulation of leukocyte migration	2	32	0.222495
GO:0033044	regulation of chromosome organization	7	468	0.223319
GO:0021561	facial nerve development	2	33	0.224313
GO:0018130	heterocycle biosynthetic process	30	3692	0.225663
GO:0032270	positive regulation of cellular protein metabolic process	16	1605	0.22966
GO:0016458	gene silencing	6	366	0.230126
GO:0032352	positive regulation of hormone metabolic process	2	34	0.231581
GO:0030097	hemopoiesis	12	1086	0.231704
GO:0042327	positive regulation of phosphorylation	12	1064	0.232727
GO:0072330	monocarboxylic acid biosynthetic process	6	353	0.232934
GO:0045667	regulation of osteoblast differentiation	4	172	0.235951
GO:0046513	ceramide biosynthetic process	2	34	0.235951
GO:0032651	regulation of interleukin-1 beta production	2	34	0.236111
GO:0006928	movement of cell or subcellular component	22	2499	0.236111
GO:0052547	regulation of peptidase activity	6	360	0.23756
GO:0071624	positive regulation of granulocyte chemotaxis	2	36	0.23756
GO:0051248	negative regulation of protein metabolic process	13	1215	0.238048
GO:0070372	regulation of ERK1 and ERK2 cascade	5	263	0.238775
GO:0048565	digestive tract development	5	264	0.240871
GO:0009713	catechol-containing compound biosynthetic process	2	35	0.241304
GO:0008610	lipid biosynthetic process	8	581	0.24146
GO:0021783	preganglionic parasympathetic fiber development	2	35	0.24146
GO:0048486	parasympathetic nervous system development	2	35	0.24146
GO:0051704	multi-organism process	25	2949	0.24146
GO:0044283	small molecule biosynthetic process	10	814	0.242956
GO:1904950	negative regulation of establishment of protein localization	5	265	0.245439
GO:0055085	transmembrane transport	13	1197	0.248208
GO:0071621	granulocyte chemotaxis	3	96	0.248208
GO:0051896	regulation of protein kinase B signaling	4	178	0.251043
GO:0048881	mechanosensory lateral line system development	2	37	0.252766
GO:0048915	posterior lateral line system development	2	37	0.252766
GO:0032200	telomere organization	4	182	0.252766
GO:0008207	C21-steroid hormone metabolic process	2	35	0.254999
GO:0050805	negative regulation of synaptic transmission	3	100	0.25534
GO:2000117	negative regulation of cysteine-type endopeptidase activity	3	97	0.256394
GO:0072012	glomerulus vasculature development	2	35	0.256394
GO:0003008	system process	21	2363	0.256405
GO:1901385	regulation of voltage-gated calcium channel activity	2	36	0.257039
GO:0046958	nonassociative learning	2	37	0.257039
GO:0033238	regulation of cellular amine metabolic process	3	95	0.258358
GO:0090022	regulation of neutrophil chemotaxis	2	38	0.258358
GO:0070293	renal absorption	2	36	0.260625
GO:0045995	regulation of embryonic development	5	276	0.261222
GO:0032881	regulation of polysaccharide metabolic process	3	101	0.261222
GO:1905517	macrophage migration	2	37	0.262717
GO:0099177	regulation of trans-synaptic signaling	8	604	0.265181
GO:0043603	cellular amide metabolic process	12	1074	0.265181
GO:1902624	positive regulation of neutrophil migration	2	39	0.265181
GO:0060390	regulation of SMAD protein signal transduction	2	38	0.265181
GO:0060395	SMAD protein signal transduction	2	38	0.265181
GO:0010594	regulation of endothelial cell migration	4	182	0.265181
GO:0043604	amide biosynthetic process	10	822	0.266432
GO:0019226	transmission of nerve impulse	3	103	0.270129
GO:0071560	cellular response to transforming growth factor beta stimulus	5	275	0.270129
GO:0071772	response to BMP	5	274	0.270159
GO:0071852	fungal-type cell wall organization or biogenesis	2	39	0.270159
GO:0002573	myeloid leukocyte differentiation	5	283	0.270159
GO:0007166	cell surface receptor signaling pathway	22	2540	0.271202
GO:0002685	regulation of leukocyte migration	4	183	0.271202
GO:1903318	negative regulation of protein maturation	2	37	0.271202
GO:0030316	osteoclast differentiation	3	106	0.271202
GO:0009410	response to xenobiotic stimulus	5	276	0.271202
GO:1901216	positive regulation of neuron death	3	104	0.271929
GO:0060541	respiratory system development	7	489	0.271989
GO:0014075	response to amine	2	39	0.273021
GO:0006811	ion transport	15	1497	0.273021
GO:0051567	histone H3-K9 methylation	2	43	0.273021
GO:0035239	tube morphogenesis	14	1385	0.273129
GO:0051049	regulation of transport	20	2243	0.277151
GO:0032269	negative regulation of cellular protein metabolic process	12	1123	0.277669
GO:0048512	circadian behavior	3	106	0.277669
GO:0050792	regulation of viral process	5	273	0.277669
GO:0071375	cellular response to peptide hormone stimulus	6	383	0.280701
GO:0030855	epithelial cell differentiation	11	990	0.281506
GO:0051154	negative regulation of striated muscle cell differentiation	2	39	0.282736
GO:0040029	regulation of gene expression, epigenetic	6	394	0.282736
GO:0060148	positive regulation of posttranscriptional gene silencing	2	41	0.283044
GO:0042552	myelination	3	109	0.283044
GO:0051931	regulation of sensory perception	2	38	0.284087
GO:0003283	atrial septum development	2	42	0.284087
GO:0051702	interaction with symbiont	3	104	0.284087
GO:0051851	modification by host of symbiont morphology or physiology	3	104	0.284087
GO:0051254	positive regulation of RNA metabolic process	15	1536	0.284087
GO:0065002	intracellular protein transmembrane transport	2	41	0.284087
GO:0048806	genitalia development	4	184	0.284087
GO:0009615	response to virus	5	289	0.284087
GO:0006807	nitrogen compound metabolic process	53	7866	0.286599
GO:0046879	hormone secretion	7	497	0.287247
GO:0030593	neutrophil chemotaxis	2	42	0.28739
GO:0006643	membrane lipid metabolic process	4	192	0.287521
GO:0001893	maternal placenta development	2	40	0.287521
GO:0002520	immune system development	13	1280	0.288501
GO:0032722	positive regulation of chemokine production	2	41	0.288717
GO:0045448	mitotic cell cycle, embryonic	2	42	0.288717
GO:0051129	negative regulation of cellular component organization	11	997	0.288717
GO:0071241	cellular response to inorganic substance	5	289	0.288717
GO:0048705	skeletal system morphogenesis	6	386	0.288717
GO:0048880	sensory system development	2	42	0.289021
GO:0048925	lateral line system development	2	42	0.289021
GO:0043491	protein kinase B signaling	4	192	0.290027
GO:0036294	cellular response to decreased oxygen levels	4	189	0.292798
GO:0006812	cation transport	12	1113	0.295116
GO:0048678	response to axon injury	3	109	0.299304
GO:0099024	plasma membrane invagination	3	113	0.299657
GO:0001666	response to hypoxia	4	190	0.299657
GO:0090257	regulation of muscle system process	7	499	0.302637
GO:0010332	response to gamma radiation	2	43	0.302637
GO:0010817	regulation of hormone levels	9	744	0.302637
GO:0050708	regulation of protein secretion	7	505	0.302637
GO:0021604	cranial nerve structural organization	2	43	0.304905
GO:0060537	muscle tissue development	9	755	0.308181
GO:1903131	mononuclear cell differentiation	2	45	0.308181
GO:0043044	ATP-dependent chromatin remodeling	2	43	0.308735
GO:0016070	RNA metabolic process	29	3675	0.308735
GO:0050900	leukocyte migration	5	292	0.310014
GO:0000165	MAPK cascade	10	883	0.31095
GO:0007517	muscle organ development	8	630	0.312215
GO:0010324	membrane invagination	3	117	0.320319
GO:0060561	apoptotic process involved in morphogenesis	2	43	0.321997
GO:0042136	neurotransmitter biosynthetic process	3	113	0.321997
GO:0034641	cellular nitrogen compound metabolic process	43	5987	0.321997
GO:0031667	response to nutrient levels	7	526	0.321997
GO:0007622	rhythmic behavior	3	115	0.324026
GO:0048859	formation of anatomical boundary	2	43	0.324026
GO:0032652	regulation of interleukin-1 production	2	45	0.324283
GO:1902622	regulation of neutrophil migration	2	46	0.324745
GO:0032640	tumor necrosis factor production	3	113	0.324834
GO:0001649	osteoblast differentiation	4	204	0.326305
GO:0071453	cellular response to oxygen levels	4	198	0.326865
GO:0007409	axonogenesis	10	897	0.327062
GO:0046394	carboxylic acid biosynthetic process	7	507	0.327882
GO:0016053	organic acid biosynthetic process	7	509	0.332738
GO:0046677	response to antibiotic	6	406	0.332738
GO:0090184	positive regulation of kidney development	2	45	0.332738
GO:2000378	negative regulation of reactive oxygen species metabolic process	2	45	0.332758
GO:0009914	hormone transport	7	522	0.332758
GO:0045923	positive regulation of fatty acid metabolic process	2	49	0.332758
GO:0060992	response to fungicide	1	6	0.334353
GO:1903555	regulation of tumor necrosis factor superfamily cytokine production	3	115	0.334353
GO:0032611	interleukin-1 beta production	2	47	0.334939
GO:0010951	negative regulation of endopeptidase activity	3	114	0.337549
GO:0071706	tumor necrosis factor superfamily cytokine production	3	116	0.338602
GO:1901654	response to ketone	4	202	0.338992
GO:1904407	positive regulation of nitric oxide metabolic process	2	50	0.343926
GO:0032103	positive regulation of response to external stimulus	5	307	0.343926
GO:0032663	regulation of interleukin-2 production	2	51	0.343926
GO:0001547	antral ovarian follicle growth	1	6	0.343926
GO:0048165	fused antrum stage	1	6	0.343926
GO:2000648	positive regulation of stem cell proliferation	2	47	0.343926
GO:0060191	regulation of lipase activity	3	118	0.343926
GO:0009445	putrescine metabolic process	1	6	0.343926
GO:0006614	SRP-dependent cotranslational protein targeting to membrane	1	7	0.347101
GO:0032762	mast cell cytokine production	1	6	0.348011
GO:0032763	regulation of mast cell cytokine production	1	6	0.348011
GO:0045777	positive regulation of blood pressure	2	49	0.348011
GO:0060479	lung cell differentiation	2	50	0.348011
GO:1903428	positive regulation of reactive oxygen species biosynthetic process	2	51	0.348011
GO:0051818	disruption of cells of other organism involved in symbiotic interaction	1	6	0.348011
GO:0051852	disruption by host of symbiont cells	1	6	0.348011
GO:0051873	killing by host of symbiont cells	1	6	0.348011
GO:0051883	killing of cells in other organism involved in symbiotic interaction	1	6	0.348011
GO:0070942	neutrophil mediated cytotoxicity	1	6	0.348011
GO:0070943	neutrophil mediated killing of symbiont cell	1	6	0.348011
GO:0070944	neutrophil mediated killing of bacterium	1	6	0.348011
GO:2000181	negative regulation of blood vessel morphogenesis	3	126	0.348011
GO:0071840	cellular component organization or biogenesis	44	6356	0.348353
GO:1901360	organic cyclic compound metabolic process	42	5857	0.349376
GO:0036118	hyaluranon cable assembly	1	6	0.349682
GO:1900104	regulation of hyaluranon cable assembly	1	6	0.349682
GO:0030261	chromosome condensation	2	52	0.351237
GO:0097530	granulocyte migration	3	120	0.352226
GO:0042592	homeostatic process	18	2035	0.353527
GO:0031102	neuron projection regeneration	3	121	0.35528
GO:0043903	regulation of symbiosis, encompassing mutualism through parasitism	5	305	0.35528
GO:0010212	response to ionizing radiation	3	125	0.35528
GO:0071806	protein transmembrane transport	2	51	0.357313
GO:0048144	fibroblast proliferation	3	120	0.358514
GO:0048609	multicellular organismal reproductive process	15	1609	0.358514
GO:0008306	associative learning	4	209	0.358514
GO:0051492	regulation of stress fiber assembly	3	126	0.358514
GO:0032623	interleukin-2 production	2	54	0.359619
GO:0006417	regulation of translation	6	420	0.359619
GO:0031062	positive regulation of histone methylation	2	52	0.360011
GO:1903140	regulation of establishment of endothelial barrier	1	6	0.360773
GO:0070371	ERK1 and ERK2 cascade	5	315	0.360773
GO:0018023	peptidyl-lysine trimethylation	2	52	0.360974
GO:0043435	response to corticotropin-releasing hormone	1	6	0.360974
GO:0043066	negative regulation of apoptotic process	8	665	0.361612
GO:0007275	multicellular organism development	41	5860	0.363696
GO:0032655	regulation of interleukin-12 production	2	50	0.366427
GO:0061564	axon development	11	1060	0.367511
GO:0071622	regulation of granulocyte chemotaxis	2	52	0.367834
GO:0051966	regulation of synaptic transmission, glutamatergic	2	51	0.367834
GO:0051234	establishment of localization	34	4596	0.368633
GO:0009273	peptidoglycan-based cell wall biogenesis	1	6	0.368781
GO:1901343	negative regulation of vasculature development	3	131	0.369378
GO:0007568	aging	6	431	0.369378
GO:0045087	innate immune response	7	544	0.369378
GO:0030323	respiratory tube development	5	324	0.369378
GO:0043408	regulation of MAPK cascade	9	798	0.372915
GO:0046984	regulation of hemoglobin biosynthetic process	1	7	0.375014
GO:0046467	membrane lipid biosynthetic process	3	126	0.37789
GO:0021782	glial cell development	3	127	0.378622
GO:0051148	negative regulation of muscle cell differentiation	2	52	0.378741
GO:0051952	regulation of amine transport	3	125	0.38038
GO:0022605	mammalian oogenesis stage	1	7	0.382112
GO:0046885	regulation of hormone biosynthetic process	2	54	0.382112
GO:0061912	selective autophagy	5	321	0.382112
GO:0006596	polyamine biosynthetic process	1	7	0.382112
GO:0007292	female gamete generation	8	674	0.382112
GO:0006047	UDP-N-acetylglucosamine metabolic process	1	8	0.382112
GO:0097283	keratinocyte apoptotic process	1	7	0.382112
GO:0014738	regulation of muscle hyperplasia	1	7	0.382318
GO:0071479	cellular response to ionizing radiation	2	53	0.382318
GO:0006563	L-serine metabolic process	1	7	0.382318
GO:0002832	negative regulation of response to biotic stimulus	2	54	0.382318
GO:0030162	regulation of proteolysis	8	676	0.383059
GO:0051093	negative regulation of developmental process	13	1349	0.385522
GO:0031640	killing of cells of other organism	1	7	0.386375
GO:0043588	skin development	5	329	0.390459
GO:0048872	homeostasis of number of cells	6	443	0.390459
GO:0009832	plant-type cell wall biogenesis	1	7	0.390459
GO:0042940	D-amino acid transport	1	6	0.390459
GO:0043616	keratinocyte proliferation	2	56	0.392268
GO:0061437	renal system vasculature development	2	52	0.394546
GO:0061440	kidney vasculature development	2	52	0.394546
GO:0015837	amine transport	3	129	0.395073
GO:0045937	positive regulation of phosphate metabolic process	12	1210	0.396758
GO:1900195	positive regulation of oocyte maturation	1	7	0.397508
GO:2000810	regulation of bicellular tight junction assembly	1	8	0.398591
GO:0032504	multicellular organism reproduction	15	1646	0.398591
GO:0032612	interleukin-1 production	2	55	0.399859
GO:0010001	glial cell differentiation	5	328	0.400153
GO:0032907	transforming growth factor beta3 production	1	8	0.400153
GO:0032910	regulation of transforming growth factor beta3 production	1	8	0.400153
GO:0006979	response to oxidative stress	6	449	0.400153
GO:0032615	interleukin-12 production	2	55	0.400727
GO:0042325	regulation of phosphorylation	15	1654	0.401372
GO:0051568	histone H3-K4 methylation	2	59	0.402422
GO:0022010	central nervous system myelination	1	8	0.402422
GO:0003343	septum transversum development	1	9	0.402706
GO:0072210	metanephric nephron development	2	56	0.405557
GO:0006520	cellular amino acid metabolic process	10	940	0.405557
GO:0010562	positive regulation of phosphorus metabolic process	12	1218	0.405557
GO:0048534	hematopoietic or lymphoid organ development	12	1243	0.405557
GO:0007167	enzyme linked receptor protein signaling pathway	13	1356	0.405854
GO:1904529	regulation of actin filament binding	1	7	0.40598
GO:1904616	regulation of actin binding	1	7	0.40598
GO:0034250	positive regulation of cellular amide metabolic process	4	222	0.40598
GO:0051259	protein complex oligomerization	7	549	0.407691
GO:0071466	cellular response to xenobiotic stimulus	3	135	0.409289
GO:0014900	muscle hyperplasia	1	8	0.409671
GO:0048871	multicellular organismal homeostasis	6	442	0.409671
GO:0055123	digestive system development	5	335	0.409671
GO:0017144	drug metabolic process	10	928	0.409671
GO:0033688	regulation of osteoblast proliferation	2	57	0.411788
GO:0050796	regulation of insulin secretion	4	228	0.413757
GO:0044364	disruption of cells of other organism	1	8	0.421339
GO:0003006	developmental process involved in reproduction	15	1671	0.422094
GO:0031034	myosin filament assembly	2	60	0.422658
GO:0045137	development of primary sexual characteristics	6	448	0.422658
GO:0002424	T cell mediated immune response to tumor cell	1	7	0.422658
GO:0002066	columnar/cuboidal epithelial cell development	5	338	0.424341
GO:0042063	gliogenesis	6	454	0.424341
GO:0014706	striated muscle tissue development	8	703	0.424341
GO:0071704	organic substance metabolic process	55	8460	0.424341
GO:0010466	negative regulation of peptidase activity	3	133	0.424838
GO:0060249	anatomical structure homeostasis	7	576	0.424907
GO:0046189	phenol-containing compound biosynthetic process	2	58	0.427865
GO:0034614	cellular response to reactive oxygen species	3	140	0.427865
GO:0032823	regulation of natural killer cell differentiation	1	9	0.429858
GO:0030154	cell differentiation	33	4549	0.431813
GO:0010634	positive regulation of epithelial cell migration	3	140	0.431813
GO:0050870	positive regulation of T cell activation	3	148	0.431813
GO:0030099	myeloid cell differentiation	7	588	0.432725
GO:0006030	chitin metabolic process	1	8	0.433356
GO:0045861	negative regulation of proteolysis	4	232	0.433356
GO:0060712	spongiotrophoblast layer development	1	9	0.433711
GO:0002791	regulation of peptide secretion	7	576	0.437019
GO:0010762	regulation of fibroblast migration	2	59	0.437757
GO:0042326	negative regulation of phosphorylation	7	593	0.437757
GO:0031056	regulation of histone modification	4	241	0.437757
GO:0042541	hemoglobin biosynthetic process	1	9	0.437757
GO:0033077	T cell differentiation in thymus	2	62	0.438156
GO:0048506	regulation of timing of meristematic phase transition	1	8	0.441961
GO:0030148	sphingolipid biosynthetic process	2	61	0.441961
GO:0003097	renal water transport	1	8	0.442777
GO:0016310	phosphorylation	19	2274	0.443561
GO:0034341	response to interferon-gamma	2	63	0.443561
GO:0002679	respiratory burst involved in defense response	1	9	0.443561
GO:1904994	regulation of leukocyte adhesion to vascular endothelial cell	1	9	0.443561
GO:0048701	embryonic cranial skeleton morphogenesis	2	58	0.446313
GO:0031649	heat generation	1	8	0.446517
GO:0031650	regulation of heat generation	1	8	0.446517
GO:1903354	regulation of distal tip cell migration	1	9	0.44663
GO:0006911	phagocytosis, engulfment	2	64	0.446936
GO:0046349	amino sugar biosynthetic process	1	10	0.447164
GO:0003171	atrioventricular valve development	2	63	0.448243
GO:0023061	signal release	8	708	0.451858
GO:0045893	positive regulation of transcription, DNA-templated	11	1125	0.451858
GO:0035026	leading edge cell differentiation	1	9	0.451858
GO:0034762	regulation of transmembrane transport	8	710	0.451858
GO:0043536	positive regulation of blood vessel endothelial cell migration	1	9	0.452516
GO:0000723	telomere maintenance	3	149	0.452516
GO:0045778	positive regulation of ossification	3	144	0.452516
GO:0001818	negative regulation of cytokine production	4	241	0.454291
