# Supplementary material
Source: publisher figshare collection journal article supplement (https://gsajournals.figshare.com/articles/dataset/_/7376780)
Supplement: Supplementary file 1 [file 1]

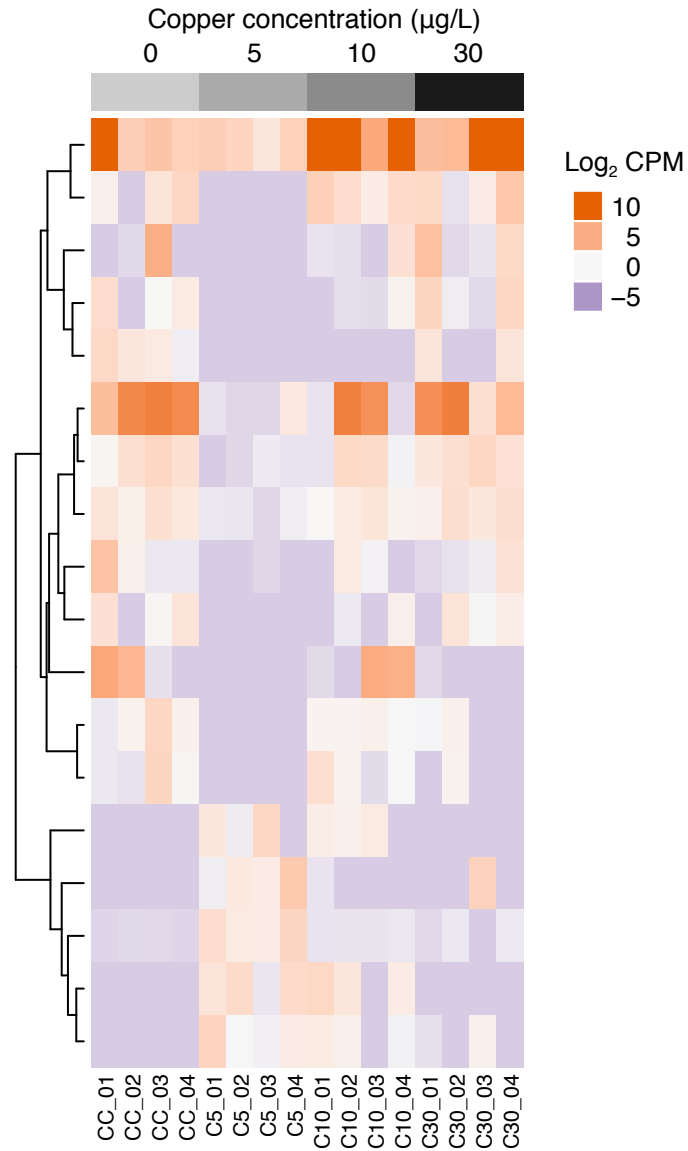

**Figure S1:** Heatmap of normalized transcript abundance (Log<sub>2</sub> counts per million) for 26 genes differentially expressed following 24 hour treatment with 5  $\mu\text{g/L}$  copper.
